# Supplementary material for: Implications of including a magnetic ion (Cr3+ and Fe3+) at the vanadium site in a geometrically frustrated spinel MgV2O4: magnetic and catalytic properties
Source: Royal Society of Chemistry journal article supplement (doi:10.1039/c9dt03468d), 2019-01-01
Supplement: c9dt03468d1.pdf [file c9dt03468d1.pdf]

Electronic Supplementary Information (ESI)

Implications of including a magnetic ion ( $\text{Cr}^{3+}$  and  $\text{Fe}^{3+}$ ) at the vanadium site in  
geometrically frustrated spinel  $\text{MgV}_2\text{O}_4$ : Magnetic and Catalytic properties

---

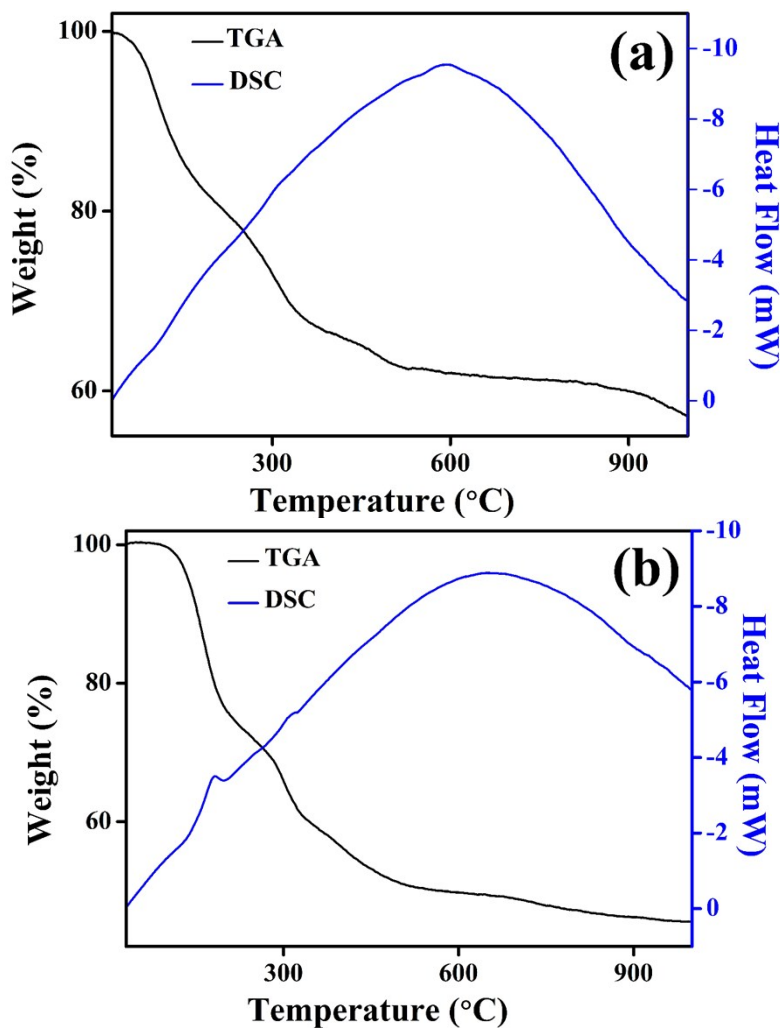

**Fig. S1** Thermogravimetric (TG) and Differential Scanning Calorimetric (DSC) traces of xerogel obtained from the reaction of propylene oxide with (a)  $\text{MgCl}_2 \cdot 6\text{H}_2\text{O}$ ,  $\text{VCl}_3$ ,  $\text{CrCl}_3 \cdot 6\text{H}_2\text{O}$  and (b)  $\text{MgCl}_2 \cdot 6\text{H}_2\text{O}$ ,  $\text{VCl}_3$ ,  $\text{Fe}(\text{NO}_3)_3 \cdot 9\text{H}_2\text{O}$ .

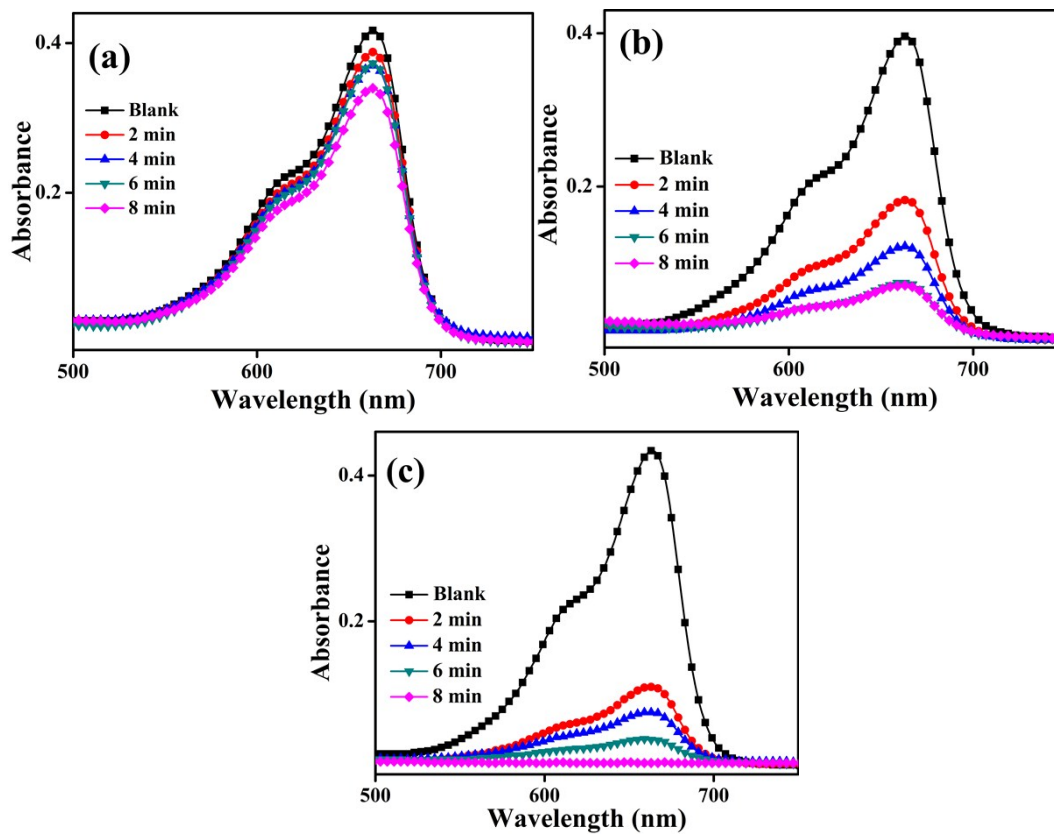

**Fig. S2** Temporal changes in the absorbance characteristics of 50 mL MB dye solution (10 μM) in the presence of 5 mL H<sub>2</sub>O<sub>2</sub> and 50 mg of (a) MgV<sub>2</sub>O<sub>4</sub>, (b) MgVCrO<sub>4</sub> and (c) MgVFeO<sub>4</sub> as catalyst.

**Table S1** Summary of the crystallographic details from the Rietveld refinement of PXRD patterns

| <b>Formula</b>                   | <b>MgV<sub>2</sub>O<sub>4</sub></b> | <b>MgVCrO<sub>4</sub></b>           | <b>MgVFeO<sub>4</sub></b>           |
|----------------------------------|-------------------------------------|-------------------------------------|-------------------------------------|
| Crystal system                   | Cubic                               | Cubic                               | Cubic                               |
| Space group                      | <i>Fd</i> $\bar{3}$ <i>m</i> (#227) | <i>Fd</i> $\bar{3}$ <i>m</i> (#227) | <i>Fd</i> $\bar{3}$ <i>m</i> (#227) |
| <i>a</i> (Å)                     | 8.3990 (4)                          | 8.3497 (5)                          | 8.3957 (27)                         |
| Cell volume (Å <sup>3</sup> )    | 592.49 (8)                          | 582.12 (10)                         | 591.81 (6)                          |
| Formula weight (g/mol)           | 187.64                              | 184.04                              | 189.12                              |
| Z                                | 8                                   | 8                                   | 8                                   |
| $\rho$ calc (g/cm <sup>3</sup> ) | 4.207                               | 4.200                               | 4.246                               |
| Temperature (°C)                 | 25                                  | 25                                  | 25                                  |
| No. of data points               | 2250                                | 2250                                | 1875                                |
| 2 $\theta$ range                 | 10-100°                             | 10-100°                             | 25-100°                             |
| <i>R<sub>p</sub></i> (%)         | 7.38                                | 6.54                                | 3.10                                |
| <i>R<sub>wp</sub></i> (%)        | 9.57                                | 8.22                                | 3.99                                |
| $\chi^2$                         | 1.461                               | 1.343                               | 1.318                               |

**Table S2:** Atomic parameters after the final cycle of refinement of MgV<sub>2</sub>O<sub>4</sub>, MgCrVO<sub>4</sub>, and MgVFeO<sub>4</sub>.

| <b>Atoms</b> | <b>Wyck</b> | <b><i>x/a</i></b> | <b><i>y/b</i></b> | <b><i>z/c</i></b> | <b>SOF</b> | <b>U(iso)Å<sup>2</sup></b> |
|--------------|-------------|-------------------|-------------------|-------------------|------------|----------------------------|
| V            | <i>16c</i>  | 0                 | 0                 | 0                 | 0.971 (8)  | 0.0264 (8)                 |
| Mg           | <i>8b</i>   | 0.375             | 0.375             | 0.375             | 1.015 (9)  | 0.0286 (14)                |
| O            | <i>32e</i>  | 0.2411 (4)        | 0.2411 (4)        | 0.2411 (4)        | 1          | 0.025                      |
| V            | <i>16c</i>  | 0                 | 0                 | 0                 | 0.437 (8)  | 0.0197 (10)                |
| Cr           | <i>16c</i>  | 0                 | 0                 | 0                 | 0.496 (7)  | 0.0197 (10)                |
| Mg           | <i>8b</i>   | 0.375             | 0.375             | 0.375             | 0.986 (8)  | 0.0344 (21)                |
| O            | <i>32e</i>  | 0.2409 (6)        | 0.2409 (6)        | 0.2409 (6)        | 1.0        | 0.025                      |
| V            | <i>16c</i>  | 0                 | 0                 | 0                 | 0.520 (27) | 0.022(4)                   |
| Fe           | <i>16c</i>  | 0                 | 0                 | 0                 | 0.397 (19) | 0.0322 (32)                |
| Mg           | <i>8b</i>   | 0.375             | 0.375             | 0.375             | 0.992 (18) | 0.0209 (30)                |
| O            | <i>32e</i>  | 0.2402 (8)        | 0.2402 (8)        | 0.2402 (8)        | 1.0        | 0.025                      |
